# Supplementary material
Source: MDPI journal article supplement (https://www.mdpi.com/2410-3888/7/5/287)
Supplement: s1 [file s1]

Supplementary Materials

# Antibacterial Activity of *Bacillus* Strains against Acute Hepatopancreatic Necrosis Disease-Causing *Vibrio campbellii* in Pacific White Leg Shrimp

Hye Jin Jeon <sup>1,†</sup>, Jae Won Song <sup>2,†</sup>, Chorong Lee <sup>1</sup>, Bumkeun Kim <sup>1</sup>, Seon Young Park <sup>3</sup>, Ji Hyung Kim <sup>4,\*</sup>, Jee Eun Han <sup>1,\*</sup> and Jae Hak Park <sup>2,\*</sup>

<sup>1</sup> College of Veterinary Medicine, Kyungpook National University, Daegu 41566, Korea

<sup>2</sup> Department of Laboratory Animal Medicine, College of Veterinary Medicine and Research Institute for Veterinary Science, Seoul National University, Seoul, 08826, Korea

<sup>3</sup> Division of Animal and Dairy Sciences, College of Agriculture and Life Science, Chungnam National University, Daejeon 34134, Korea

<sup>4</sup> Department of Food Science and Biotechnology, Gachon University, Seongnam 13120, Korea

\* Correspondence: kzh81@gachon.ac.kr (J.H.K.); jehan@knu.ac.kr (J.E.H.); pjhak@snu.ac.kr (J.H.P.)

† These authors contributed equally to this work.

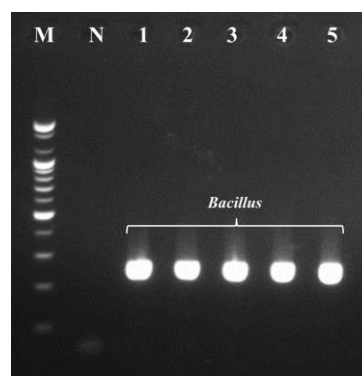

a)

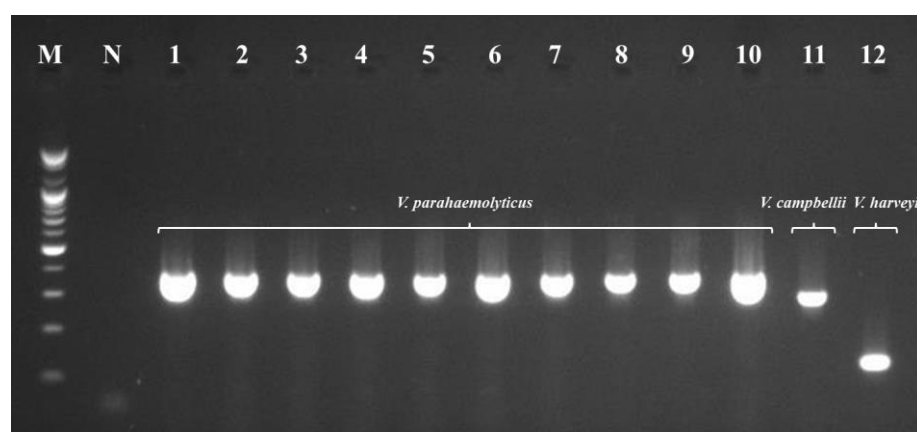

b)

**Figure S1.** a) PCR analysis for *Bacillus* identification (263 bp). Lane M: 100-bp ladder, Lane N: Negative control (DDH<sub>2</sub>O), Lane 1: B1, Lane 2: B3, Lane 3: B5, Lane 4: B7, and Lane 5: B8. b) PCR analysis for *Vibrio* spp. identification (*V. parahaemolyticus*: 349 bp, *V. campbellii*: 294 bp, *V. harveyi*: 121 bp). Lane M: 100-bp ladder, Lane N: Negative control (DDH<sub>2</sub>O), Lane 1: 13-028/A3, Lane 2: 15-250/20, Lane 3: CH49, Lane 4: CH50, Lane 5: CH51, Lane 6: CH52, Lane 7: CH53, Lane 8: 19-021D1, Lane 9: 19-022A1, Lane 10: NSU116, Lane 11: 16-904/1, and Lane 12: LB4.

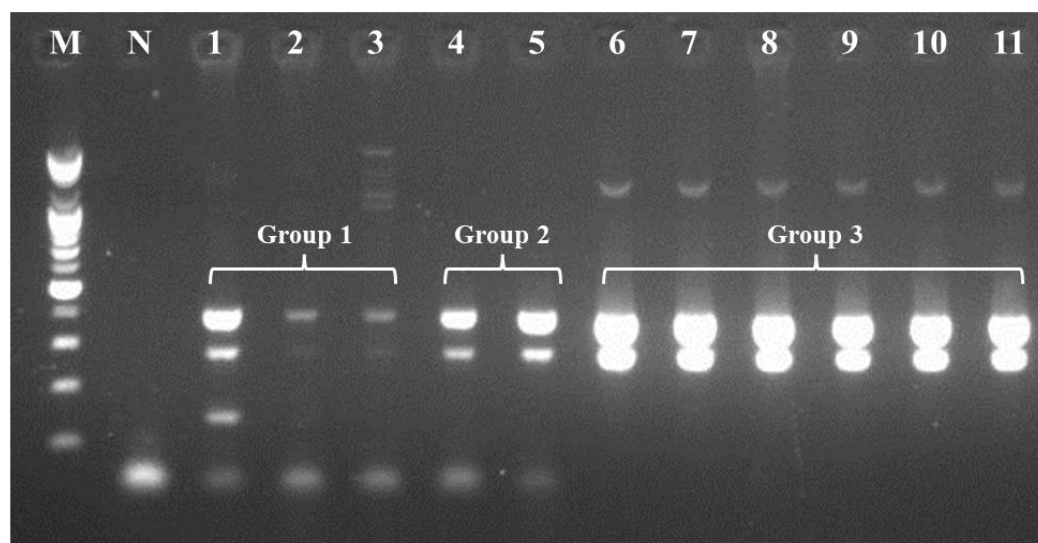

**Figure S2.** PCR analysis was performed to identify the AHPND toxin genes (*pirA*: 284 bp, *pirB*: 392 bp) in dead shrimp. Lane M: 100-bp ladder, Lane N: Negative control (DDH<sub>2</sub>O), Lane 1–3: dead shrimp in group 1 (*V*<sub>CAHPND</sub> immersion after B1 treatment), Lane 4–5: dead shrimp in group 2 (*V*<sub>CAHPND</sub> immersion after B3 treatment), and Lane 6–11: dead shrimp in group 3 (*V*<sub>CAHPND</sub> immersion without B1 and B3 treatment).

**Table S1.** Clear zone diameter (mm) illustrating the antibacterial activity of *Bacillus* strains used in this study against 12 *Vibrio* strains.

| <i>Vibrio</i> strains | Type strain <sup>a</sup><br>( <i>B. velezensis</i> ) | <i>Bacillus</i> strains |         |      |         |      |
|-----------------------|------------------------------------------------------|-------------------------|---------|------|---------|------|
|                       |                                                      | B1                      | B3      | B5   | B7      | B8   |
| 16-904/1              | <0.5                                                 | 1.5                     | 1.0     | –    | <0.5    | 0.5  |
| 13-028/A3             | 1.0                                                  | –                       | 0.5     | –    | –       | –    |
| 15-250/20             | <0.5                                                 | –                       | 0.5     | <0.5 | –       | <0.5 |
| CH49                  | <0.5                                                 | 0.5                     | 0.5     | –    | –       | –    |
| CH50                  | <0.5                                                 | –                       | 0.5     | –    | –       | <0.5 |
| CH51                  | –                                                    | –                       | <0.5    | 1.0  | –       | –    |
| CH52                  | <0.5                                                 | –                       | <0.5    | –    | –       | –    |
| CH53                  | –                                                    | 2.0                     | 2.0     | 1.5  | 0.5     | 0.5  |
| 19-021D1              | <0.5                                                 | 2.0                     | 1.5-2.0 | 1.0  | 0.5     | 0.5  |
| 19-022A1              | <0.5                                                 | 2.0                     | 2.0     | 1.0  | 0.5-1.0 | 0.5  |
| NSU116                | 0.5–1.0                                              | 2.0                     | 2.0     | 0.5  | 0.5     | 0.5  |
| LB4                   | –                                                    | 0.5                     | 0.5     | 0.5  | –       | –    |

<sup>a</sup>: CR-502<sup>T</sup> (=NRRL B-41580<sup>T</sup>). –: No clear zones were observed.

**Table S2.** Clear zone images of *Bacillus* strains (type strain, B1, and B3) against the representative *Vibrio* strains (16-904/1, 19-021D1, and 19-022A1).

| <i>Vibrio</i> strains                      | <i>Bacillus</i> strains                                                           |                                                                                     |                                                                                     |
|--------------------------------------------|-----------------------------------------------------------------------------------|-------------------------------------------------------------------------------------|-------------------------------------------------------------------------------------|
|                                            | Type strain <sup>a</sup><br>( <i>B. velezensis</i> )                              | B1                                                                                  | B3                                                                                  |
| 16-904/1<br>( <i>V. campbellii</i> )       |  |  |  |
| 19-021D1<br>( <i>V. parahaemolyticus</i> ) |  |  |  |
| 19-022A1<br>( <i>V. parahaemolyticus</i> ) |  |  |  |

<sup>a</sup>: CR-502<sup>T</sup> (=NRRL B-41580<sup>T</sup>).

**Table S3.** The predicted secondary metabolite gene clusters in *Bacillus velezensis* NRRL B-41580<sup>T</sup> using anti-SMASH.

| Contig | Position |         | Type                    | Biosynthetic gene clusters         | Substance                  | Similarity (%) |
|--------|----------|---------|-------------------------|------------------------------------|----------------------------|----------------|
|        | From     | To      |                         |                                    |                            |                |
| 11     | 557,919  | 651,711 | transAT-PKS             | Polyketide + NRP                   | Difficidin                 | 100            |
|        |          |         | RiPP-like               | RiPP:head-to-tail cyclized peptide | Amylocyclacin              | 100            |
| 15     | 316,967  | 368,757 | NRPS                    | NRP                                | Bacillibactin              | 100            |
|        |          |         |                         |                                    | Paenibactin                | 100            |
|        |          |         |                         | NRP:NRP siderophore                | Bacillibactin              | 100            |
| 16     | 1        | 66,223  | transAT-PKS             | Polyketide + NRP                   | Bacillaene                 | 85             |
|        | 291,097  | 379,327 | transAT-PKS             | Polyketide                         | Macrolactin H              | 100            |
|        |          |         |                         |                                    | Macrolactin H / B / 1c / E | 100            |
|        | 242,499  | 283,917 | Other                   | Other                              | Bacilysin                  | 100            |
| 17     | 440,952  | 464,140 | Lanthipepti de-class-ii | RiPP:lanthipeptide                 | Mersacidin                 | 100            |
| 18     | 2        | 100,307 | transAT-PKS             | Polyketide + NRP:lipo peptide      | Bacillomycin D             | 100            |
|        |          |         |                         | NRP + Polyketide                   | Mycosubtilin Iturin        | 100<br>88      |
|        |          |         | NRPS                    | NRP                                | Paenilarvins               | 100            |
|        |          |         |                         |                                    | Fengycin                   | 86             |

**Table S4.** The additional secondary metabolite gene clusters in *Bacillus* isolates B1 and B3 using anti-SMASH.

| Region                     | Position  |           | Type                       | Biosynthetic<br>gene clusters | Substance      | Similarity<br>(%) |
|----------------------------|-----------|-----------|----------------------------|-------------------------------|----------------|-------------------|
|                            | From      | To        |                            |                               |                |                   |
| <i>Bacillus</i> isolate B1 |           |           |                            |                               |                |                   |
| 3                          | 1,025,227 | 1,065,953 | T3PKS                      | ND*                           | ND             | -                 |
| 4                          | 1,131,293 | 1,151,419 | Terpene                    | ND                            | ND             | -                 |
| 8                          | 1,962,757 | 1,991,645 | Lanthipeptide-<br>class-ii | ND                            | ND             | -                 |
| 9                          | 2,112,138 | 2,132,878 | Terpene                    | ND                            | ND             | -                 |
| 10                         | 2,214,922 | 2,256,166 | PKS-like                   | Saccharide                    | Butiroid A / B | 7                 |
| <i>Bacillus</i> isolate B3 |           |           |                            |                               |                |                   |
| 1                          | 68,787    | 88,913    | Terpene                    | ND*                           | ND             | -                 |
| 5                          | 900,251   | 929,139   | Lanthipeptide-<br>class-ii | ND*                           | ND             | -                 |
| 6                          | 1,049,632 | 1,070,372 | Terpene                    | ND*                           | ND             | -                 |
| 7                          | 1,152,416 | 1,193,660 | PKS-like                   | Saccharide                    | Butiroid A / B | 7                 |
| 12                         | 3,891,499 | 3,929,788 | T3PKS                      | ND*                           | ND             | -                 |

\*ND, No detection of the closest compound from the MiBIG database.
